# Supplementary material
Source: PubMed Central journal article supplement (PMC9275358)
Supplement: mmc1.pdf [file mmc1.pdf]

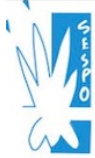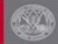

## Employment situation of dentists, hygienists and auxiliary staff in the face of COVID-19 in Spain

Dear colleague:

The University of Murcia and the Spanish Society of Epidemiology and Oral Public Health (SESPO) are investigating the impact of the Covid-19 pandemic on the professional tasks of dentists, dental hygienists and auxiliary staff working both in the public and private health field in Spain.

We would like you to take a few minutes to answer these questions concerning your personal assessment of the situation we are experiencing.

Completion of this survey implies express consent to participate in the study.

Thank you in advance for your cooperation.

1. Sex:

- a. Male.
- b. Female.

2. Age:

3. Professional category

- a. Dentist.
- b. Dental hygienist.
- c. Nursing assistant.

4. Years of work experience:

5. The Autonomous Community where you work:

6. Number of inhabitants of the area where you work:

- a. Rural area (< 20,000 inhabitants).
- b. Semi-urban area (20,000-100,000 inhabitants).
- c. Urban area (>100,000 inhabitants).

7. MAIN work environment (you can choose more than one option):

- a. Public.
- b. Private.

8. Since the 14<sup>th</sup> of March to the present date:

- a. I have been treating scheduled patients.

- b. I am still working in my usual position, treating only dental emergencies.
  - c. I am still working but mainly on support functions related to Covid-19 (triage, case tracking, etc.).
  - d. I am at home, in case I need to go to work.
  - e. I am not working face-to-face, just telephone consultations.
  - f. I have stopped working completely until further notice.
9. If you have been working on patient clinical care, point out what type of masks you have MAINLY used since the start of the pandemic:
- a. Surgical.
  - b. FFP2.
  - c. FFP3.
  - d. I have not been wearing a mask in my usual work.
10. If you have been working on patient clinical care, indicate the protective equipment you have used routinely at work, in addition to a mask. You can choose more than one option:
- a. Facial screen.
  - b. Protective glasses.
  - c. Waterproof suit on top of regular work clothes.
  - d. None of the above.
11. Do you have PPE for staff at the dental office?
- a. Yes, for everyone.
  - b. Yes, but only for the dentist, not for the whole team.
  - c. We do not have PPE.
12. Have you had to care for patients infected with Covid-19?
- g. Yes
  - h. No
  - i. I do not know
13. The information concerning the protective measures necessary to prevent professional infection that you have implemented in your clinic has come from (you can choose more than one option):
- a. Health service management.
  - b. Clinic management.
  - c. The Council of Dentists/Professional Colleges.
  - d. From my personal search on the web or social networks.
  - e. I have not received any information.
14. In your workplace, have the official recommendations made to prevent infection been met?
- a. Yes, always.
  - b. Almost always
  - c. Sometimes
  - d. Almost never
  - e. Never

15. Did you have symptoms compatible with Covid-19 infection during February, March, or April? If so, indicate which:
- Persistent cough.
  - Fever (more than 37.5° C).
  - Vomiting.
  - Diarrhoea.
  - Sore throat.
  - Headache.
  - Muscle pain.
  - Unexplained tiredness.
  - Dyspnoea.
  - Alterations in smell and taste.
  - Serious lung problems.
  - I have not had any symptoms.
16. If you have had symptoms, please indicate the duration of the symptoms.
- 1-3 days.
  - 4-7 days.
  - 8-13 days.
  - > 14 days.
17. Have you been in self-isolation for two weeks for Covid-19?
- Yes, because of a confirmed case.
  - Yes, because of a suspected case.
  - Yes, because of a close contact.
  - I have not been in isolation.
18. If you have been in isolation, have you been tested for Covid-19 after the quarantine period?
- Yes, I am waiting for the results.
  - Yes, and it was positive.
  - Yes, and it was negative.
  - No, because there is no test available.
  - No, the protocols in force do not consider it necessary.
19. Are you afraid to leave the house for fear of getting infected?
- Never
  - Almost never
  - Sometimes
  - Almost always
  - Always
